# Supplementary material for: Stream acidification and reduced aquatic prey availability are associated with dietary shifts in an obligate riparian Neotropical migratory songbird
Source: PeerJ. 2018 Jul 6;6:e5141. doi: 10.7717/peerj.5141 (PMC6037135; doi:10.7717/peerj.5141)
Supplement: Data S3 [file peerj-06-5141-s006.xlsx]

## Sheet: Sheet1
MOTU	Taxon	Score	Match
denovo989	Arthropoda Insecta Diptera Tipulidae Tipula;sp.	1	100
denovo977	Arthropoda Insecta Plecoptera Leuctridae Leuctra ferruginea	5	97.99
denovo970	Arthropoda Insecta Diptera Rhagionidae Symphoromyia fulvipes	1	100
denovo954	Arthropoda Insecta Diptera Tachinidae Panzeria connivens	5	97.98
denovo946	Arthropoda Insecta Lepidoptera;Fa.;Ge.;sp.	4	100
denovo939	Arthropoda Insecta Diptera Stratiomyidae Beris hauseri	5	97.44
denovo913	Arthropoda Insecta Ephemeroptera Ephemerellidae Ephemerella invaria	5	97.1
denovo907	Arthropoda Insecta Diptera Tipulidae Tipula;sp.	1	100
denovo904	No Match	6	.
denovo890	No Match	6	.
denovo864	No Match	6	.
denovo816	Arthropoda Insecta Lepidoptera Tortricidae Pseudexentera;sp.	1	100
denovo811	Arthropoda Insecta Coleoptera Curculionidae Sciaphilus asperatus	1	100
denovo768	Arthropoda Insecta Hemiptera Miridae Neolygus omnivagus	1	100
denovo761	No Match	6	.
denovo760	No Match	6	.
denovo721	No Match	6	.
denovo674	No Match	6	.
denovo670	Arthropoda Insecta;Or.;Fa.;Ge.;sp.	5	98.81
denovo668	No Match	6	.
denovo658	Arthropoda Insecta Plecoptera Perlodidae Isoperla;sp.	1	100
denovo641	Arthropoda Insecta Megaloptera Corydalidae Nigronia fasciatus	1	100
denovo621	No Match	6	.
denovo603	No Match	6	.
denovo591	Arthropoda Insecta Lepidoptera;Fa.;Ge.;sp.	5	100
denovo562	Arthropoda Insecta Diptera Tipulidae Tipula hermannia	1	100
denovo529	Arthropoda Insecta Lepidoptera Noctuidae Orthosia rubescens	1	100
denovo525	No Match	6	.
denovo517	Arthropoda Insecta Coleoptera Dytiscidae Hydroporus morio	5	97.62
denovo5133	Arthropoda Insecta Diptera Tipulidae Tipula duplex	2	98.72
denovo5075	No Match	6	.
denovo5072	Arthropoda Insecta Diptera Tipulidae Tipula hermannia	2	98.41
denovo5058	Arthropoda Insecta Lepidoptera;Fa.;Ge.;sp.	5	98.56
denovo5056	Arthropoda Insecta Diptera;Fa.;Ge.;sp.	5	98.84
denovo5033	Arthropoda Insecta Plecoptera Leuctridae Leuctra;sp.	1	100
denovo5023	Arthropoda Insecta Ephemeroptera Heptageniidae Maccaffertium ithaca	1	100
denovo5021	Arthropoda Insecta Diptera Tipulidae Dolichopeza subvenosa	1	100
denovo5008	No Match	6	.
denovo499	Arthropoda Insecta Ephemeroptera Ephemerellidae Eurylophella funeralis	1	100
denovo4979	Arthropoda Insecta Lepidoptera Geometridae Ectropis crepuscularia	1	100
denovo4966	Arthropoda Insecta Plecoptera Chloroperlidae Alloperla atlantica	5	97.39
denovo4931	No Match	6	.
denovo4920	Arthropoda Insecta Lepidoptera;Fa.;Ge.;sp.	5	98.89
denovo4893	Arthropoda Insecta Ephemeroptera Heptageniidae Cinygmula subaequalis	1	100
denovo4853	Arthropoda Insecta Ephemeroptera Ameletidae Ameletus sp.	1	100
denovo4828	Arthropoda Malacostraca Decapoda Cambaridae Cambarus;sp.	1	100
denovo4761	Arthropoda Insecta Ephemeroptera Heptageniidae Cinygmula subaequalis	1	100
denovo4741	Arthropoda Insecta Plecoptera Chloroperlidae Haploperla brevis	1	100
denovo4726	Arthropoda Insecta Ephemeroptera Ephemerellidae Ephemerella dorothea	1	100
denovo4677	Arthropoda Insecta Ephemeroptera Ephemeridae Ephemera guttulata	1	100
denovo4668	Arthropoda Insecta Ephemeroptera Heptageniidae Epeorus pleuralis	1	100
denovo466	No Match	6	.
denovo4657	No Match	6	.
denovo4598	No Match	6	.
denovo4575	Arthropoda Insecta Diptera Tipulidae Tipula;sp.	2	98.35
denovo455	Arthropoda Insecta Diptera Syrphidae Temnostoma alternans	1	100
denovo4546	Arthropoda Insecta Hemiptera Miridae Neolygus inconspicuus	5	97.44
denovo4518	No Match	6	.
denovo4484	Arthropoda Insecta Diptera Syrphidae Somula decora	2	99.36
denovo4482	Arthropoda Insecta Diptera Tabanidae Hybomitra pechumani	2	98.72
denovo4406	Arthropoda Insecta Lepidoptera Noctuidae Spodoptera exigua	5	97.44
denovo4376	Arthropoda Insecta Trichoptera Rhyacophilidae Rhyacophila minora	1	100
denovo4341	Arthropoda Insecta Lepidoptera Geometridae Lomographa;sp.	2	99.36
denovo4339	Arthropoda Arachnida Trombidiformes Protziidae Protzia sp	2	98.72
denovo4337	No Match	6	.
denovo4328	Arthropoda Insecta Megaloptera Corydalidae Nigronia serricornis	1	100
denovo4318	Arthropoda Insecta Diptera Tipulidae Tipula hermannia	2	99.32
denovo4315	Arthropoda Insecta Ephemeroptera Heptageniidae Maccaffertium pudicum	1	100
denovo4266	Arthropoda Insecta Hemiptera Alydidae Nariscus fumosus	2	98.81
denovo4228	Arthropoda Insecta Lepidoptera;Fa.;Ge.;sp.	5	99.26
denovo4212	Arthropoda Insecta Diptera Chironomidae Krenopelopia sp.	2	98.85
denovo421	Arthropoda Insecta Lepidoptera;Fa.;Ge.;sp.	5	100
denovo4182	Arthropoda Insecta Plecoptera Chloroperlidae Alloperla;sp.	2	98.72
denovo4175	Arthropoda Insecta Mecoptera Bittacidae Bittacus pilicornis	2	98.08
denovo4164	Arthropoda Insecta Ephemeroptera Ameletidae Ameletus lineatus	1	100
denovo4162	Arthropoda Insecta Diptera Culicidae Anopheles;sp.	2	98.77
denovo4155	Arthropoda Insecta Lepidoptera;Fa.;Ge.;sp.	5	100
denovo4154	Arthropoda Insecta Plecoptera Perlidae Acroneuria carolinensis	1	100
denovo4131	Arthropoda Insecta Diptera Syrphidae Allograpta lucifera	5	97.78
denovo4127	Arthropoda Insecta Plecoptera Perlodidae Clioperla clio	1	100
denovo4115	Arthropoda Insecta Diptera Tipulidae Tipula hermannia	5	97.62
denovo4073	No Match	6	.
denovo4028	Arthropoda Insecta Diptera Scathophagidae Cordilura fuscipes	5	97.44
denovo4017	No Match	6	.
denovo4015	Arthropoda Insecta Diptera Tabanidae Hybomitra;sp.	1	100
denovo3941	Arthropoda Insecta Diptera Tipulidae Tipula hermannia	2	99.21
denovo3928	Arthropoda Insecta Lepidoptera Tortricidae Pseudexentera spoliana	1	100
denovo3921	Arthropoda Insecta Trichoptera Limnephilidae Limnephilus stigma	2	98.84
denovo3912	Arthropoda Insecta Plecoptera Leuctridae Leuctra tenella	5	97.44
denovo3893	Arthropoda Insecta Lepidoptera Noctuidae Lithophane;sp.	1	100
denovo3881	Arthropoda Insecta Lepidoptera;Fa.;Ge.;sp.	5	100
denovo3858	Arthropoda Insecta Diptera Hybotidae Trichina sp.	5	97.85
denovo3776	Arthropoda Insecta Orthoptera Rhaphidophoridae Euhadenoecus puteanus	1	100
denovo3766	Arthropoda Insecta Lepidoptera;Fa.;Ge.;sp.	5	100
denovo3757	Arthropoda Insecta Lepidoptera Gelechiidae Chionodes pereyra	1	100
denovo3738	No Match	6	.
denovo3733	Arthropoda Insecta Orthoptera Tettigoniidae Lamecosoma inermis	5	97.44
denovo3728	Arthropoda Insecta Lepidoptera Noctuidae Protogygia comstocki	5	97.04
denovo3723	Arthropoda Insecta Lepidoptera;Fa.;Ge.;sp.	5	100
denovo3698	Arthropoda Insecta Megaloptera Corydalidae Neoneuromus maclachlani	5	97.85
denovo3679	Arthropoda Insecta Trichoptera Limnephilidae Pycnopsyche sp.	1	100
denovo3651	Arthropoda Insecta Diptera Limoniidae Austrolimnophila toxoneura	1	100
denovo3624	Arthropoda Insecta Diptera Limoniidae Metalimnobia immatura	1	100
denovo3614	Arthropoda Insecta Ephemeroptera Baetidae Baetis phoebus	1	100
denovo3593	Arthropoda Insecta Lepidoptera;Fa.;Ge.;sp.	5	100
denovo3569	Arthropoda Insecta Plecoptera Perlodidae Isoperla;sp.	1	100
denovo355	Arthropoda Insecta Lepidoptera;Fa.;Ge.;sp.	5	100
denovo3540	Arthropoda Insecta Diptera Pediciidae Tricyphona katahdin	1	100
denovo3529	Arthropoda Insecta Lepidoptera Geometridae Physocleora;sp.	5	97.92
denovo3498	Arthropoda Insecta Hymenoptera Tenthredinidae Craterocercus obtusus	1	100
denovo3494	Arthropoda Insecta Plecoptera Leuctridae Leuctra tenella	5	97.44
denovo3459	No Match	6	.
denovo3442	Arthropoda Insecta Lepidoptera Geometridae Eupithecia columbiata	1	100
denovo3383	No Match	6	.
denovo3377	Arthropoda Insecta Diptera Tabanidae Chrysops;sp.	1	100
denovo3332	Arthropoda Arachnida Araneae Lycosidae Piratula insularis	2	99.36
denovo3326	Arthropoda Insecta;Or.;Fa.;Ge.;sp.	5	98.92
denovo3324	No Match	6	.
denovo3323	Arthropoda Insecta Lepidoptera;Fa.;Ge.;sp.	5	100
denovo3283	Arthropoda Insecta Ephemeroptera Heptageniidae Epeorus pleuralis	5	97.44
denovo325	Arthropoda Insecta Trichoptera Rhyacophilidae Rhyacophila nigrita	1	100
denovo3240	Arthropoda Insecta Ephemeroptera Baetidae Baetis sp.	1	100
denovo3220	Arthropoda Insecta Plecoptera Leuctridae Leuctra sp.	2	98.08
denovo3216	Arthropoda Insecta Lepidoptera Noctuidae Orthosia hibisci	5	97.39
denovo3202	Arthropoda Insecta Diptera Limoniidae Rhipidia maculata	1	100
denovo3190	Arthropoda Insecta Diptera Chironomidae Krenopelopia sp.	2	98.85
denovo3185	Arthropoda Insecta Lepidoptera Erebidae Tigrioides sp.	5	97.85
denovo3178	No Match	6	.
denovo3170	Arthropoda Insecta Lepidoptera Lycaenidae Strephonota;sp.	5	97.7
denovo3129	Arthropoda Insecta Plecoptera Chloroperlidae Sweltsa;sp.	1	100
denovo3117	No Match	6	.
denovo3109	Arthropoda Insecta Lepidoptera;Fa.;Ge.;sp.	5	100
denovo3090	Arthropoda Insecta Diptera Tipulidae Tipula hermannia	2	99.32
denovo3089	No Match	6	.
denovo3066	Arthropoda Insecta Lepidoptera Noctuidae Anathix ralla	1	100
denovo3063	Arthropoda Insecta Diptera Limoniidae Euphylidorea adustoides	1	100
denovo3023	Arthropoda Insecta Coleoptera Scarabaeidae Melinopterus prodromus	5	97.53
denovo3017	Arthropoda Insecta Plecoptera Chloroperlidae Alloperla usa	1	100
denovo3011	Arthropoda Insecta Coleoptera Carabidae Pterostichus vernalis	5	97.7
denovo3008	Arthropoda Insecta Lepidoptera Nymphalidae Calisto aquilum	1	100
denovo30	No Match	6	.
denovo2975	Arthropoda Insecta Lepidoptera;Fa.;Ge.;sp.	5	100
denovo2974	Arthropoda Insecta Diptera Tachinidae Blepharomyia tibialis	1	100
denovo2966	Arthropoda Insecta Diptera Chironomidae Krenopelopia sp.	2	98.85
denovo2936	Arthropoda Insecta Diptera Empididae Rhamphomyia sp.	1	100
denovo2924	Arthropoda Insecta Megaloptera Corydalidae Nigronia fasciatus	2	98
denovo2917	No Match	6	.
denovo2903	No Match	6	.
denovo2867	Arthropoda Insecta Diptera Pediciidae Pedicia sp.	1	100
denovo2865	Arthropoda Insecta Psocodea Caeciliusidae Valenzuela flavidus	1	100
denovo2827	Arthropoda Insecta Blattodea Cryptocercidae Cryptocercus punctulatus	1	100
denovo2823	No Match	6	.
denovo2802	Arthropoda Insecta Megaloptera Corydalidae Nigronia fasciatus	2	99.33
denovo2768	No Match	6	.
denovo2714	Arthropoda Insecta Trichoptera Limnephilidae Limnephilus stigma	2	98.84
denovo2708	Arthropoda Insecta Plecoptera Nemouridae Amphinemura;sp.	1	100
denovo269	Arthropoda Insecta Diptera Tachinidae Compsilura concinnata	1	100
denovo2680	Arthropoda Insecta Diptera Limoniidae Limonia indigena	1	100
denovo2669	Arthropoda Insecta Lepidoptera Geometridae Eois sp.	5	100
denovo2662	Arthropoda Insecta Lepidoptera;Fa.;Ge.;sp.	4	100
denovo2655	Arthropoda Insecta Lepidoptera;Fa.;Ge.;sp.	4	98.89
denovo2650	Arthropoda Insecta Diptera Muscidae Myospila meditabunda	5	97.47
denovo2619	No Match	6	.
denovo2604	Arthropoda Insecta Diptera Tipulidae Tipula;sp.	1	100
denovo2601	Arthropoda Insecta Plecoptera Perlidae Acroneuria carolinensis	1	100
denovo2514	Arthropoda Insecta Diptera Limoniidae Limnophila rufibasis	1	100
denovo25	Arthropoda Insecta Lepidoptera Erebidae Hypena baltimoralis	1	100
denovo2479	Arthropoda Insecta Lepidoptera Noctuidae Orthosia rubescens	1	100
denovo2397	No Match	6	.
denovo2382	No Match	6	.
denovo2325	No Match	6	.
denovo2322	Arthropoda Insecta Diptera Muscidae Myospila meditabunda	5	97.47
denovo2315	Arthropoda Insecta Coleoptera Dytiscidae Hydroporus morio	5	97.62
denovo2269	Arthropoda Insecta Lepidoptera Noctuidae Eupsilia;sp.	1	100
denovo2262	No Match	6	.
denovo2237	Arthropoda Insecta Diptera Tipulidae Tipula longiventris	1	100
denovo2231	Arthropoda Insecta Trichoptera Goeridae Goera stylata	2	99.33
denovo2202	Arthropoda Insecta Lepidoptera;Fa.;Ge.;sp.	4	100
denovo2200	No Match	6	.
denovo2176	No Match	6	.
denovo2171	No Match	6	.
denovo2153	Arthropoda Insecta Lepidoptera;Fa.;Ge.;sp.	4	100
denovo2118	Arthropoda Insecta Diptera Culicidae Culex tritaeniorhynchus	5	97.62
denovo211	Arthropoda Insecta Diptera Tipulidae Tipula hermannia	2	98.08
denovo2101	No Match	6	.
denovo2100	Arthropoda Insecta Ephemeroptera Isonychiidae Isonychia sp.	1	100
denovo2095	Arthropoda Insecta Diptera Syrphidae Temnostoma;sp.	1	100
denovo2078	Arthropoda Insecta Lepidoptera Geometridae Speranza pustularia	1	100
denovo204	Arthropoda Insecta Lepidoptera;Fa.;Ge.;sp.	4	100
denovo2029	Arthropoda Insecta Diptera Chironomidae Krenopelopia sp.	2	98.5
denovo2028	No Match	6	.
denovo2026	Arthropoda Insecta Lepidoptera Tortricidae;Ge.;sp.	3	100
denovo2013	Arthropoda Insecta Plecoptera Chloroperlidae Alloperla;sp.	2	99.36
denovo2009	Arthropoda Insecta Diptera Tabanidae Hybomitra;sp.	1	100
denovo2006	Arthropoda Insecta Lepidoptera;Fa.;Ge.;sp.	4	100
denovo1986	Arthropoda Insecta Plecoptera Leuctridae Leuctra sp.	2	98.08
denovo1946	Arthropoda Insecta Plecoptera Perlidae Acroneuria carolinensis	2	98.72
denovo1938	No Match	6	.
denovo1930	Arthropoda Insecta Lepidoptera;Fa.;Ge.;sp.	4	99.21
denovo193	Arthropoda Insecta Diptera Tipulidae Tipula oropezoides	1	100
denovo192	Arthropoda Insecta Lepidoptera;Fa.;Ge.;sp.	4	98.06
denovo1900	Arthropoda Insecta Ephemeroptera Isonychiidae Isonychia sp.	5	97.44
denovo1884	Arthropoda Insecta Lepidoptera Pieridae Phoebis argante	5	97.92
denovo1882	Arthropoda Insecta Lepidoptera;Fa.;Ge.;sp.	4	100
denovo1856	Arthropoda Insecta Lepidoptera Noctuidae Orthosia rubescens	1	100
denovo1833	Arthropoda Insecta Lepidoptera Noctuidae Orthodes cynica	2	98.72
denovo1819	Arthropoda Insecta Diptera Scathophagidae Cordilura fuscipes	5	97.44
denovo1794	Arthropoda Insecta Diptera Stratiomyidae Allognosta fuscitarsis	1	100
denovo1782	No Match	6	.
denovo1779	Arthropoda Insecta Diptera Tachinidae Belvosia;sp.	5	97.7
denovo177	Arthropoda Insecta Lepidoptera Erebidae Pharga pholausalis	1	100
denovo173	No Match	6	.
denovo1725	No Match	6	.
denovo1721	No Match	6	.
denovo172	Arthropoda Insecta Ephemeroptera Ephemerellidae Ephemerella dorothea	2	99.15
denovo1702	No Match	6	.
denovo169	Arthropoda Insecta Plecoptera Pteronarcyidae Pteronarcys proteus	1	100
denovo1675	No Match	6	.
denovo1666	Arthropoda Insecta Diptera Dolichopodidae Gymnopternus spectabilis	1	100
denovo1658	Arthropoda Insecta Diptera;Fa.;Ge.;sp.	4	98.81
denovo1646	Arthropoda Insecta Psocodea Peripsocidae Peripsocus subfasciatus	1	100
denovo1634	Arthropoda Insecta Megaloptera Corydalidae Nigronia fasciatus	5	97.33
denovo1615	No Match	6	.
denovo1605	Arthropoda Insecta Diptera Tachinidae Houghia aurifera	5	97.62
denovo1580	Arthropoda Insecta Lepidoptera Noctuidae;Ge.;sp.	3	98.9
denovo155	Arthropoda Insecta Diptera Tipulidae Tipula hermannia	2	98.41
denovo1496	Arthropoda Maxillopoda Sessilia Chthamalidae Chthamalus malayensis	2	98.72
denovo1487	No Match	6	.
denovo1485	No Match	6	.
denovo144	Arthropoda Insecta Trichoptera Limnephilidae Pycnopsyche gentilis	2	98.08
denovo1430	No Match	6	.
denovo1398	Arthropoda Insecta Plecoptera Leuctridae Leuctra;sp.	1	100
denovo1397	No Match	6	.
denovo1377	Arthropoda Insecta Plecoptera Capniidae Arsapnia coyote	1	100
denovo1374	Arthropoda Insecta Diptera Tabanidae Tabanus;sp.	2	98.08
denovo1344	Arthropoda Insecta Diptera Syrphidae Xylota quadrimaculata	1	100
denovo1341	Arthropoda Insecta;Or.;Fa.;Ge.;sp.	4	98.84
denovo134	Arthropoda Insecta Lepidoptera Noctuidae Orthosia rubescens	1	100
denovo1312	Arthropoda Insecta Diptera Tipulidae Tipula hermannia	5	97.44
denovo1299	Arthropoda Insecta Lepidoptera;Fa.;Ge.;sp.	4	100
denovo1292	Arthropoda Insecta Diptera Sciaridae Schwenckfeldina quadrispinosa	2	99.35
denovo1250	Arthropoda Insecta Trichoptera Phryganeidae Ptilostomis ocellifera	1	100
denovo1209	Arthropoda Insecta Lepidoptera Tortricidae Dichrorampha petiverella	2	98.06
denovo1207	Arthropoda Insecta Lepidoptera;Fa.;Ge.;sp.	4	98.89
denovo1206	Arthropoda Insecta Diptera Syrphidae Allograpta lucifera	5	97.78
denovo1190	Arthropoda Insecta Lepidoptera;Fa.;Ge.;sp.	4	100
denovo1161	Arthropoda Insecta Lepidoptera;Fa.;Ge.;sp.	4	100
denovo1125	No Match	6	.
denovo1122	No Match	6	.
denovo1104	Arthropoda Arachnida Araneae Philodromidae Philodromus rufus	2	99.35
denovo1100	Arthropoda Insecta Diptera Limoniidae Eutonia alleni	1	100
denovo1078	Arthropoda Insecta Diptera Tipulidae Tipula oropezoides	5	97.22
denovo1052	Arthropoda Insecta Lepidoptera;Fa.;Ge.;sp.	4	100
denovo1008	Arthropoda Insecta Diptera Tipulidae Ctenophora dorsalis	1	100

## Sheet: Sheet2
MOTU	Taxon	Score	Match
denovo989	Arthropoda Insecta Diptera Tipulidae Tipula sp.	1	100
denovo970	Arthropoda Insecta Diptera Rhagionidae Symphoromyia fulvipes	1	100
denovo907	Arthropoda Insecta Diptera Tipulidae Tipula sp.	1	100
denovo816	Arthropoda Insecta Lepidoptera Tortricidae Pseudexentera sp.	1	100
denovo811	Arthropoda Insecta Coleoptera Curculionidae Sciaphilus asperatus	1	100
denovo768	Arthropoda Insecta Hemiptera Miridae Neolygus omnivagus	1	100
denovo658	Arthropoda Insecta Plecoptera Perlodidae Isoperla sp.	1	100
denovo641	Arthropoda Insecta Megaloptera Corydalidae Nigronia fasciatus	1	100
denovo562	Arthropoda Insecta Diptera Tipulidae Tipula hermannia	1	100
denovo529	Arthropoda Insecta Lepidoptera Noctuidae Orthosia rubescens	1	100
denovo5033	Arthropoda Insecta Plecoptera Leuctridae Leuctra sp.	1	100
denovo5023	Arthropoda Insecta Ephemeroptera Heptageniidae Maccaffertium ithaca	1	100
denovo5021	Arthropoda Insecta Diptera Tipulidae Dolichopeza subvenosa	1	100
denovo499	Arthropoda Insecta Ephemeroptera Ephemerellidae Eurylophella funeralis	1	100
denovo4979	Arthropoda Insecta Lepidoptera Geometridae Ectropis crepuscularia	1	100
denovo4893	Arthropoda Insecta Ephemeroptera Heptageniidae Cinygmula subaequalis	1	100
denovo4853	Arthropoda Insecta Ephemeroptera Ameletidae Ameletus sp.	1	100
denovo4828	Arthropoda Malacostraca Decapoda Cambaridae Cambarus sp.	1	100
denovo4761	Arthropoda Insecta Ephemeroptera Heptageniidae Cinygmula subaequalis	1	100
denovo4741	Arthropoda Insecta Plecoptera Chloroperlidae Haploperla brevis	1	100
denovo4726	Arthropoda Insecta Ephemeroptera Ephemerellidae Ephemerella dorothea	1	100
denovo4677	Arthropoda Insecta Ephemeroptera Ephemeridae Ephemera guttulata	1	100
denovo4668	Arthropoda Insecta Ephemeroptera Heptageniidae Epeorus pleuralis	1	100
denovo455	Arthropoda Insecta Diptera Syrphidae Temnostoma alternans	1	100
denovo4376	Arthropoda Insecta Trichoptera Rhyacophilidae Rhyacophila minora	1	100
denovo4328	Arthropoda Insecta Megaloptera Corydalidae Nigronia serricornis	1	100
denovo4315	Arthropoda Insecta Ephemeroptera Heptageniidae Maccaffertium pudicum	1	100
denovo4164	Arthropoda Insecta Ephemeroptera Ameletidae Ameletus lineatus	1	100
denovo4154	Arthropoda Insecta Plecoptera Perlidae Acroneuria carolinensis	1	100
denovo4127	Arthropoda Insecta Plecoptera Perlodidae Clioperla clio	1	100
denovo4015	Arthropoda Insecta Diptera Tabanidae Hybomitra sp.	1	100
denovo3928	Arthropoda Insecta Lepidoptera Tortricidae Pseudexentera spoliana	1	100
denovo3893	Arthropoda Insecta Lepidoptera Noctuidae Lithophane sp.	1	100
denovo3776	Arthropoda Insecta Orthoptera Rhaphidophoridae Euhadenoecus puteanus	1	100
denovo3757	Arthropoda Insecta Lepidoptera Gelechiidae Chionodes pereyra	1	100
denovo3679	Arthropoda Insecta Trichoptera Limnephilidae Pycnopsyche sp.	1	100
denovo3651	Arthropoda Insecta Diptera Limoniidae Austrolimnophila toxoneura	1	100
denovo3624	Arthropoda Insecta Diptera Limoniidae Metalimnobia immatura	1	100
denovo3614	Arthropoda Insecta Ephemeroptera Baetidae Baetis phoebus	1	100
denovo3569	Arthropoda Insecta Plecoptera Perlodidae Isoperla sp.	1	100
denovo3540	Arthropoda Insecta Diptera Pediciidae Tricyphona katahdin	1	100
denovo3498	Arthropoda Insecta Hymenoptera Tenthredinidae Craterocercus obtusus	1	100
denovo3442	Arthropoda Insecta Lepidoptera Geometridae Eupithecia columbiata	1	100
denovo3377	Arthropoda Insecta Diptera Tabanidae Chrysops sp.	1	100
denovo325	Arthropoda Insecta Trichoptera Rhyacophilidae Rhyacophila nigrita	1	100
denovo3240	Arthropoda Insecta Ephemeroptera Baetidae Baetis sp.	1	100
denovo3202	Arthropoda Insecta Diptera Limoniidae Rhipidia maculata	1	100
denovo3129	Arthropoda Insecta Plecoptera Chloroperlidae Sweltsa sp.	1	100
denovo3066	Arthropoda Insecta Lepidoptera Noctuidae Anathix ralla	1	100
denovo3063	Arthropoda Insecta Diptera Limoniidae Euphylidorea adustoides	1	100
denovo3017	Arthropoda Insecta Plecoptera Chloroperlidae Alloperla usa	1	100
denovo3008	Arthropoda Insecta Lepidoptera Nymphalidae Calisto aquilum	1	100
denovo2974	Arthropoda Insecta Diptera Tachinidae Blepharomyia tibialis	1	100
denovo2936	Arthropoda Insecta Diptera Empididae Rhamphomyia sp.	1	100
denovo2867	Arthropoda Insecta Diptera Pediciidae Pedicia sp.	1	100
denovo2865	Arthropoda Insecta Psocodea Caeciliusidae Valenzuela flavidus	1	100
denovo2827	Arthropoda Insecta Blattodea Cryptocercidae Cryptocercus punctulatus	1	100
denovo2708	Arthropoda Insecta Plecoptera Nemouridae Amphinemura sp.	1	100
denovo269	Arthropoda Insecta Diptera Tachinidae Compsilura concinnata	1	100
denovo2680	Arthropoda Insecta Diptera Limoniidae Limonia indigena	1	100
denovo2604	Arthropoda Insecta Diptera Tipulidae Tipula sp.	1	100
denovo2601	Arthropoda Insecta Plecoptera Perlidae Acroneuria carolinensis	1	100
denovo2514	Arthropoda Insecta Diptera Limoniidae Limnophila rufibasis	1	100
denovo25	Arthropoda Insecta Lepidoptera Erebidae Hypena baltimoralis	1	100
denovo2479	Arthropoda Insecta Lepidoptera Noctuidae Orthosia rubescens	1	100
denovo2269	Arthropoda Insecta Lepidoptera Noctuidae Eupsilia sp.	1	100
denovo2237	Arthropoda Insecta Diptera Tipulidae Tipula longiventris	1	100
denovo2100	Arthropoda Insecta Ephemeroptera Isonychiidae Isonychia sp.	1	100
denovo2095	Arthropoda Insecta Diptera Syrphidae Temnostoma sp.	1	100
denovo2078	Arthropoda Insecta Lepidoptera Geometridae Speranza pustularia	1	100
denovo2009	Arthropoda Insecta Diptera Tabanidae Hybomitra sp.	1	100
denovo193	Arthropoda Insecta Diptera Tipulidae Tipula oropezoides	1	100
denovo1856	Arthropoda Insecta Lepidoptera Noctuidae Orthosia rubescens	1	100
denovo1794	Arthropoda Insecta Diptera Stratiomyidae Allognosta fuscitarsis	1	100
denovo177	Arthropoda Insecta Lepidoptera Erebidae Pharga pholausalis	1	100
denovo169	Arthropoda Insecta Plecoptera Pteronarcyidae Pteronarcys proteus	1	100
denovo1666	Arthropoda Insecta Diptera Dolichopodidae Gymnopternus spectabilis	1	100
denovo1646	Arthropoda Insecta Psocodea Peripsocidae Peripsocus subfasciatus	1	100
denovo1398	Arthropoda Insecta Plecoptera Leuctridae Leuctra sp.	1	100
denovo1377	Arthropoda Insecta Plecoptera Capniidae Arsapnia coyote	1	100
denovo1344	Arthropoda Insecta Diptera Syrphidae Xylota quadrimaculata	1	100
denovo134	Arthropoda Insecta Lepidoptera Noctuidae Orthosia rubescens	1	100
denovo1250	Arthropoda Insecta Trichoptera Phryganeidae Ptilostomis ocellifera	1	100
denovo1100	Arthropoda Insecta Diptera Limoniidae Eutonia alleni	1	100
denovo1008	Arthropoda Insecta Diptera Tipulidae Ctenophora dorsalis	1	100
denovo4484	Arthropoda Insecta Diptera Syrphidae Somula decora	2	99.36
denovo4341	Arthropoda Insecta Lepidoptera Geometridae Lomographa sp.	2	99.36
denovo3332	Arthropoda Arachnida Araneae Lycosidae Piratula insularis	2	99.36
denovo2013	Arthropoda Insecta Plecoptera Chloroperlidae Alloperla sp.	2	99.36
denovo1292	Arthropoda Insecta Diptera Sciaridae Schwenckfeldina quadrispinosa	2	99.35
denovo1104	Arthropoda Arachnida Araneae Philodromidae Philodromus rufus	2	99.35
denovo2802	Arthropoda Insecta Megaloptera Corydalidae Nigronia fasciatus	2	99.33
denovo2231	Arthropoda Insecta Trichoptera Goeridae Goera stylata	2	99.33
denovo4318	Arthropoda Insecta Diptera Tipulidae Tipula hermannia	2	99.32
denovo3090	Arthropoda Insecta Diptera Tipulidae Tipula hermannia	2	99.32
denovo3941	Arthropoda Insecta Diptera Tipulidae Tipula hermannia	2	99.21
denovo172	Arthropoda Insecta Ephemeroptera Ephemerellidae Ephemerella dorothea	2	99.15
denovo4212	Arthropoda Insecta Diptera Chironomidae Krenopelopia sp.	2	98.85
denovo3190	Arthropoda Insecta Diptera Chironomidae Krenopelopia sp.	2	98.85
denovo2966	Arthropoda Insecta Diptera Chironomidae Krenopelopia sp.	2	98.85
denovo3921	Arthropoda Insecta Trichoptera Limnephilidae Limnephilus stigma	2	98.84
denovo2714	Arthropoda Insecta Trichoptera Limnephilidae Limnephilus stigma	2	98.84
denovo4266	Arthropoda Insecta Hemiptera Alydidae Nariscus fumosus	2	98.81
denovo4162	Arthropoda Insecta Diptera Culicidae Anopheles sp.	2	98.77
denovo5133	Arthropoda Insecta Diptera Tipulidae Tipula duplex	2	98.72
denovo4482	Arthropoda Insecta Diptera Tabanidae Hybomitra pechumani	2	98.72
denovo4339	Arthropoda Arachnida Trombidiformes Protziidae Protzia sp.	2	98.72
denovo4182	Arthropoda Insecta Plecoptera Chloroperlidae Alloperla sp.	2	98.72
denovo1946	Arthropoda Insecta Plecoptera Perlidae Acroneuria carolinensis	2	98.72
denovo1833	Arthropoda Insecta Lepidoptera Noctuidae Orthodes cynica	2	98.72
denovo2029	Arthropoda Insecta Diptera Chironomidae Krenopelopia sp.	2	98.5
denovo5072	Arthropoda Insecta Diptera Tipulidae Tipula hermannia	2	98.41
denovo155	Arthropoda Insecta Diptera Tipulidae Tipula hermannia	2	98.41
denovo4575	Arthropoda Insecta Diptera Tipulidae Tipula sp.	2	98.35
denovo4175	Arthropoda Insecta Mecoptera Bittacidae Bittacus pilicornis	2	98.08
denovo3220	Arthropoda Insecta Plecoptera Leuctridae Leuctra sp.	2	98.08
denovo211	Arthropoda Insecta Diptera Tipulidae Tipula hermannia	2	98.08
denovo1986	Arthropoda Insecta Plecoptera Leuctridae Leuctra sp.	2	98.08
denovo144	Arthropoda Insecta Trichoptera Limnephilidae Pycnopsyche gentilis	2	98.08
denovo1374	Arthropoda Insecta Diptera Tabanidae Tabanus sp.	2	98.08
denovo1209	Arthropoda Insecta Lepidoptera Tortricidae Dichrorampha petiverella	2	98.06
denovo2924	Arthropoda Insecta Megaloptera Corydalidae Nigronia fasciatus	2	98
denovo2026	Arthropoda Insecta Lepidoptera Tortricidae Ge. sp.	3	100
denovo3766	Arthropoda Insecta Lepidoptera Erebidae. Ge. sp.	3	100
denovo1580	Arthropoda Insecta Lepidoptera Noctuidae Ge. sp.	3	98.9
denovo946	Arthropoda Insecta Lepidoptera Fa. Ge. sp.	4	100
denovo2662	Arthropoda Insecta Lepidoptera Fa. Ge. sp.	4	100
denovo2202	Arthropoda Insecta Lepidoptera Fa. Ge. sp.	4	100
denovo2153	Arthropoda Insecta Lepidoptera Fa. Ge. sp.	4	100
denovo204	Arthropoda Insecta Lepidoptera Fa. Ge. sp.	4	100
denovo2006	Arthropoda Insecta Lepidoptera Fa. Ge. sp.	4	100
denovo1882	Arthropoda Insecta Lepidoptera Fa. Ge. sp.	4	100
denovo1299	Arthropoda Insecta Lepidoptera Fa. Ge. sp.	4	100
denovo1190	Arthropoda Insecta Lepidoptera Fa. Ge. sp.	4	100
denovo1161	Arthropoda Insecta Lepidoptera Fa. Ge. sp.	4	100
denovo1052	Arthropoda Insecta Lepidoptera Fa. Ge. sp.	4	100
denovo591	Arthropoda Insecta Lepidoptera Fa. Ge. sp.	4	100
denovo421	Arthropoda Insecta Lepidoptera Fa. Ge. sp.	4	100
denovo4155	Arthropoda Insecta Lepidoptera Fa. Ge. sp.	4	100
denovo3881	Arthropoda Insecta Lepidoptera Fa. Ge. sp.	4	100
denovo3723	Arthropoda Insecta Lepidoptera Fa. Ge. sp.	4	100
denovo3593	Arthropoda Insecta Lepidoptera Fa. Ge. sp.	4	100
denovo355	Arthropoda Insecta Lepidoptera Fa. Ge. sp.	4	100
denovo3323	Arthropoda Insecta Lepidoptera Fa. Ge. sp.	4	100
denovo3109	Arthropoda Insecta Lepidoptera Fa. Ge. sp.	4	100
denovo2975	Arthropoda Insecta Lepidoptera Fa. Ge. sp.	4	100
denovo2669	Arthropoda Insecta Lepidoptera Fa. Ge. sp.	4	100
denovo4228	Arthropoda Insecta Lepidoptera Fa. Ge. sp.	4	99.26
denovo1930	Arthropoda Insecta Lepidoptera Fa. Ge. sp.	4	99.21
denovo3326	Arthropoda Insecta Or. Fa. Ge. sp.	4	98.92
denovo2655	Arthropoda Insecta Lepidoptera Fa. Ge. sp.	4	98.89
denovo1207	Arthropoda Insecta Lepidoptera Fa. Ge. sp.	4	98.89
denovo4920	Arthropoda Insecta Lepidoptera Fa. Ge. sp.	4	98.89
denovo1341	Arthropoda Insecta Or. Fa. Ge. sp.	4	98.84
denovo5056	Arthropoda Insecta Diptera Fa. Ge. sp.	4	98.84
denovo1658	Arthropoda Insecta Diptera Fa. Ge. sp.	4	98.81
denovo670	Arthropoda Insecta Or. Fa. Ge. sp.	4	98.81
denovo5058	Arthropoda Insecta Lepidoptera Fa. Ge. sp.	4	98.56
denovo192	Arthropoda Insecta Lepidoptera Fa. Ge. sp.	4	98.06
denovo977	Arthropoda Insecta Plecoptera Leuctridae Leuctra ferruginea	5	97.99
denovo954	Arthropoda Insecta Diptera Tachinidae Panzeria connivens	5	97.98
denovo3529	Arthropoda Insecta Lepidoptera Geometridae Physocleora sp.	5	97.92
denovo1884	Arthropoda Insecta Lepidoptera Pieridae Phoebis argante	5	97.92
denovo3858	Arthropoda Insecta Diptera Hybotidae Trichina sp.	5	97.85
denovo3698	Arthropoda Insecta Megaloptera Corydalidae Neoneuromus maclachlani	5	97.85
denovo3185	Arthropoda Insecta Lepidoptera Erebidae Tigrioides sp.	5	97.85
denovo4131	Arthropoda Insecta Diptera Syrphidae Allograpta lucifera	5	97.78
denovo1206	Arthropoda Insecta Diptera Syrphidae Allograpta lucifera	5	97.78
denovo3170	Arthropoda Insecta Lepidoptera Lycaenidae Strephonota sp.	5	97.7
denovo3011	Arthropoda Insecta Coleoptera Carabidae Pterostichus vernalis	5	97.7
denovo1779	Arthropoda Insecta Diptera Tachinidae Belvosia sp.	5	97.7
denovo517	Arthropoda Insecta Coleoptera Dytiscidae Hydroporus morio	5	97.62
denovo4115	Arthropoda Insecta Diptera Tipulidae Tipula hermannia	5	97.62
denovo2315	Arthropoda Insecta Coleoptera Dytiscidae Hydroporus morio	5	97.62
denovo2118	Arthropoda Insecta Diptera Culicidae Culex tritaeniorhynchus	5	97.62
denovo1605	Arthropoda Insecta Diptera Tachinidae Houghia aurifera	5	97.62
denovo3023	Arthropoda Insecta Coleoptera Scarabaeidae Melinopterus prodromus	5	97.53
denovo2650	Arthropoda Insecta Diptera Muscidae Myospila meditabunda	5	97.47
denovo2322	Arthropoda Insecta Diptera Muscidae Myospila meditabunda	5	97.47
denovo1496	Arthropoda Insecta Diptera Scathophagidae Cordilura fuscipes	5	97.44
denovo939	Arthropoda Insecta Diptera Stratiomyidae Beris hauseri	5	97.44
denovo4546	Arthropoda Insecta Hemiptera Miridae Neolygus inconspicuus	5	97.44
denovo4406	Arthropoda Insecta Lepidoptera Noctuidae Spodoptera exigua	5	97.44
denovo4028	Arthropoda Insecta Diptera Scathophagidae Cordilura fuscipes	5	97.44
denovo3912	Arthropoda Insecta Plecoptera Leuctridae Leuctra tenella	5	97.44
denovo3733	Arthropoda Insecta Orthoptera Tettigoniidae Lamecosoma inermis	5	97.44
denovo3494	Arthropoda Insecta Plecoptera Leuctridae Leuctra tenella	5	97.44
denovo3283	Arthropoda Insecta Ephemeroptera Heptageniidae Epeorus pleuralis	5	97.44
denovo1900	Arthropoda Insecta Ephemeroptera Isonychiidae Isonychia sp.	5	97.44
denovo1819	Arthropoda Insecta Diptera Scathophagidae Cordilura fuscipes	5	97.44
denovo1312	Arthropoda Insecta Diptera Tipulidae Tipula hermannia	5	97.44
denovo4966	Arthropoda Insecta Plecoptera Chloroperlidae Alloperla atlantica	5	97.39
denovo3216	Arthropoda Insecta Lepidoptera Noctuidae Orthosia hibisci	5	97.39
denovo1634	Arthropoda Insecta Megaloptera Corydalidae Nigronia fasciatus	5	97.33
denovo1078	Arthropoda Insecta Diptera Tipulidae Tipula oropezoides	5	97.22
denovo913	Arthropoda Insecta Ephemeroptera Ephemerellidae Ephemerella invaria	5	97.1
denovo3728	Arthropoda Insecta Lepidoptera Noctuidae Protogygia comstocki	5	97.04
denovo904	No Match	6	.
denovo890	No Match	6	.
denovo864	No Match	6	.
denovo761	No Match	6	.
denovo760	No Match	6	.
denovo721	No Match	6	.
denovo674	No Match	6	.
denovo668	No Match	6	.
denovo621	No Match	6	.
denovo603	No Match	6	.
denovo525	No Match	6	.
denovo5075	No Match	6	.
denovo5008	No Match	6	.
denovo4931	No Match	6	.
denovo466	No Match	6	.
denovo4657	No Match	6	.
denovo4598	No Match	6	.
denovo4518	No Match	6	.
denovo4337	No Match	6	.
denovo4073	No Match	6	.
denovo4017	No Match	6	.
denovo3738	No Match	6	.
denovo3459	No Match	6	.
denovo3383	No Match	6	.
denovo3324	No Match	6	.
denovo3178	No Match	6	.
denovo3117	No Match	6	.
denovo3089	No Match	6	.
denovo30	No Match	6	.
denovo2917	No Match	6	.
denovo2903	No Match	6	.
denovo2823	No Match	6	.
denovo2768	No Match	6	.
denovo2619	No Match	6	.
denovo2397	No Match	6	.
denovo2382	No Match	6	.
denovo2325	No Match	6	.
denovo2262	No Match	6	.
denovo2200	No Match	6	.
denovo2176	No Match	6	.
denovo2171	No Match	6	.
denovo2101	No Match	6	.
denovo2028	No Match	6	.
denovo1938	No Match	6	.
denovo1782	No Match	6	.
denovo173	No Match	6	.
denovo1725	No Match	6	.
denovo1721	No Match	6	.
denovo1702	No Match	6	.
denovo1675	No Match	6	.
denovo1615	No Match	6	.
denovo1487	No Match	6	.
denovo1485	No Match	6	.
denovo1430	No Match	6	.
denovo1397	No Match	6	.
denovo1125	No Match	6	.
denovo1122	No Match	6	.
