# Supplementary material for: Stream acidification and reduced aquatic prey availability are associated with dietary shifts in an obligate riparian Neotropical migratory songbird
Source: PeerJ. 2018 Jul 6;6:e5141. doi: 10.7717/peerj.5141 (PMC6037135; doi:10.7717/peerj.5141)
Supplement: Data S4 [file peerj-06-5141-s007.xlsx]

## Sheet: Benthic Samples
NEST_TERRITORY	STREAM	DATE_COLLECTED	PHYLUM	CLASS	ORDER	FAMILY	GENUS	QUANTITY
BKT3	LAUREL	2015-05-29	Arthropoda	Crustacea	Decapoda	Cambaridae	Cambarus	2
BKT3	LAUREL	2015-05-29	Arthropoda	Insecta	Diptera	Chironomidae	Unidentified	3
BKT3	LAUREL	2015-05-29	Arthropoda	Insecta	Diptera	Tipulidae	Ormosia	1
BKT3	LAUREL	2015-05-29	Arthropoda	Insecta	Diptera	Tipulidae	Tipula	1
BKT3	LAUREL	2015-05-29	Arthropoda	Insecta	Diptera	Tipulidae	Dicranota	1
BKT3	LAUREL	2015-05-29	Arthropoda	Insecta	Diptera	Tipulidae	Hexatoma	2
BKT3	LAUREL	2015-05-29	Arthropoda	Insecta	Ephemeroptera	Baetidae	Baetis	28
BKT3	LAUREL	2015-05-29	Arthropoda	Insecta	Ephemeroptera	Heptageniidae	Cinygmula	1
BKT3	LAUREL	2015-05-29	Arthropoda	Crustacea	Isopoda	Asellidae	Caecidotea	2
BKT3	LAUREL	2015-05-29	Arthropoda	Insecta	Megaloptera	Corydalidae	Nigronia	1
BKT3	LAUREL	2015-05-29	Arthropoda	Insecta	Plecoptera	Leuctridae	Leuctra	49
BKT3	LAUREL	2015-05-29	Arthropoda	Insecta	Plecoptera	Nemouridae	Amphinemura	84
BKT3	LAUREL	2015-05-29	Arthropoda	Insecta	Plecoptera	Peltoperlidae	Peltoperla	1
BKT3	LAUREL	2015-05-29	Arthropoda	Insecta	Plecoptera	Perlidae	Acroneuria	1
BKT3	LAUREL	2015-05-29	Arthropoda	Insecta	Plecoptera	Perlodidae	Isoperla	2
BKT3	LAUREL	2015-05-29	Arthropoda	Insecta	Trichoptera	Hydropsychidae	Hydropsyche	1
BKT3	LAUREL	2015-05-29	Arthropoda	Insecta	Trichoptera	Hydropsychidae	Diplectrona	2
BKT3	LAUREL	2015-05-29	Arthropoda	Insecta	Trichoptera	Lepidostomatidae	Lepidostoma	4
BKT2	LOYAL	2015-05-20	Arthropoda	Insecta	Coleoptera	Elmidae	Stenelmis	1
BKT2	LOYAL	2015-05-20	Arthropoda	Insecta	Coleoptera	Elmidae	Oulimnius	20
BKT2	LOYAL	2015-05-20	Arthropoda	Insecta	Coleoptera	Elmidae	Optioservus	12
BKT2	LOYAL	2015-05-20	Arthropoda	Insecta	Coleoptera	Psephenidae	Ectopria	1
BKT2	LOYAL	2015-05-20	Arthropoda	Insecta	Diptera	Chironomidae	Unidentified	16
BKT2	LOYAL	2015-05-20	Arthropoda	Insecta	Diptera	Tipulidae	Dicranota	2
BKT2	LOYAL	2015-05-20	Arthropoda	Insecta	Ephemeroptera	Baetidae	Baetis	68
BKT2	LOYAL	2015-05-20	Arthropoda	Insecta	Ephemeroptera	Baetidae	Acentrella	18
BKT2	LOYAL	2015-05-20	Arthropoda	Insecta	Ephemeroptera	Ephemerellidae	Eurylophella	2
BKT2	LOYAL	2015-05-20	Arthropoda	Insecta	Ephemeroptera	Ephemerellidae	Ephemerella	14
BKT2	LOYAL	2015-05-20	Arthropoda	Insecta	Ephemeroptera	Heptageniidae	Stenacron	1
BKT2	LOYAL	2015-05-20	Arthropoda	Insecta	Ephemeroptera	Leptophlebiidae	Paraleptophlebia	5
BKT2	LOYAL	2015-05-20	Arthropoda	Insecta	Plecoptera	Chloroperlidae	Haploperla	4
BKT2	LOYAL	2015-05-20	Arthropoda	Insecta	Plecoptera	Leuctridae	Leuctra	11
BKT2	LOYAL	2015-05-20	Arthropoda	Insecta	Plecoptera	Perlidae	Acroneuria	2
BKT2	LOYAL	2015-05-20	Arthropoda	Insecta	Plecoptera	Perlodidae	Isoperla	3
BKT2	LOYAL	2015-05-20	Arthropoda	Insecta	Plecoptera	Taeniopterygidae	Taeniopteryx	3
BKT2	LOYAL	2015-05-20	Arthropoda	Insecta	Trichoptera	Hydropsychidae	Hydropsyche	1
BKT2	LOYAL	2015-05-20	Arthropoda	Insecta	Trichoptera	Hydropsychidae	Diplectrona	3
BKT2	LOYAL	2015-05-20	Arthropoda	Insecta	Trichoptera	Hydroptilidae	Hydroptila	1
BKT2	LOYAL	2015-05-20	Arthropoda	Insecta	Trichoptera	Philopotamidae	Dolophilodes	7
BKT2	LOYAL	2015-05-20	Arthropoda	Insecta	Trichoptera	Polycentropodidae	Polycentropus	1
BKT1	LOYAL	2015-05-20	Arthropoda	Insecta	Coleoptera	Elmidae	Oulimnius	20
BKT1	LOYAL	2015-05-20	Arthropoda	Insecta	Coleoptera	Elmidae	Optioservus	17
BKT1	LOYAL	2015-05-20	Arthropoda	Insecta	Diptera	Chironomidae	Unidentified	6
BKT1	LOYAL	2015-05-20	Arthropoda	Insecta	Diptera	Empididae	Chelifera	3
BKT1	LOYAL	2015-05-20	Arthropoda	Insecta	Diptera	Tipulidae	Dicranota	3
BKT1	LOYAL	2015-05-20	Arthropoda	Insecta	Ephemeroptera	Baetidae	Plauditus	1
BKT1	LOYAL	2015-05-20	Arthropoda	Insecta	Ephemeroptera	Baetidae	Baetis	44
BKT1	LOYAL	2015-05-20	Arthropoda	Insecta	Ephemeroptera	Baetidae	Acentrella	57
BKT1	LOYAL	2015-05-20	Arthropoda	Insecta	Ephemeroptera	Ephemerellidae	Ephemerella	19
BKT1	LOYAL	2015-05-20	Arthropoda	Insecta	Ephemeroptera	Isonychiidae	Isonychia	2
BKT1	LOYAL	2015-05-20	Arthropoda	Insecta	Plecoptera	Chloroperlidae	Haploperla	3
BKT1	LOYAL	2015-05-20	Arthropoda	Insecta	Plecoptera	Leuctridae	Leuctra	2
BKT1	LOYAL	2015-05-20	Arthropoda	Insecta	Plecoptera	Nemouridae	Amphinemura	3
BKT1	LOYAL	2015-05-20	Arthropoda	Insecta	Plecoptera	Perlidae	Acroneuria	3
BKT1	LOYAL	2015-05-20	Arthropoda	Insecta	Plecoptera	Perlodidae	Isoperla	1
BKT1	LOYAL	2015-05-20	Arthropoda	Insecta	Plecoptera	Taeniopterygidae	Taeniopteryx	3
BKT1	LOYAL	2015-05-20	Arthropoda	Insecta	Trichoptera	Hydropsychidae	Diplectrona	1
BKT1	LOYAL	2015-05-20	Arthropoda	Insecta	Trichoptera	Philopotamidae	Dolophilodes	19
BKT1	LOYAL	2015-05-20	Arthropoda	Insecta	Trichoptera	Polycentropodidae	Polycentropus	1
BKT1	LOYAL	2015-05-20	Annelida	Oligochaeta	Unidentified	Unidentified	Unidentified	1
BKT1	LOYAL	2015-05-20	Mollusca	Bivalvia	Veneroida	Sphaeriidae	Pisidium	1
BKT14	POWD	2015-06-03	Arthropoda	Insecta	Coleoptera	Elmidae	Oulimnius	1
BKT14	POWD	2015-06-03	Arthropoda	Crustacea	Decapoda	Cambaridae	Cambarus	2
BKT14	POWD	2015-06-03	Arthropoda	Insecta	Diptera	Ceratopogonidae	Probezzia	2
BKT14	POWD	2015-06-03	Arthropoda	Insecta	Diptera	Ceratopogonidae	Ceratopogon	1
BKT14	POWD	2015-06-03	Arthropoda	Insecta	Diptera	Chironomidae	Unidentified	36
BKT14	POWD	2015-06-03	Arthropoda	Insecta	Diptera	Simuliidae	Simulium	4
BKT14	POWD	2015-06-03	Arthropoda	Insecta	Diptera	Tipulidae	Limnophila	2
BKT14	POWD	2015-06-03	Arthropoda	Crustacea	Isopoda	Asellidae	Caecidotea	9
BKT14	POWD	2015-06-03	Arthropoda	Insecta	Megaloptera	Corydalidae	Nigronia	1
BKT14	POWD	2015-06-03	Arthropoda	Insecta	Plecoptera	Leuctridae	Leuctra	52
BKT14	POWD	2015-06-03	Arthropoda	Insecta	Plecoptera	Nemouridae	Amphinemura	17
BKT14	POWD	2015-06-03	Arthropoda	Insecta	Plecoptera	Peltoperlidae	Peltoperla	40
BKT14	POWD	2015-06-03	Arthropoda	Insecta	Trichoptera	Hydropsychidae	Diplectrona	1
BKT14	POWD	2015-06-03	Arthropoda	Insecta	Trichoptera	Lepidostomatidae	Lepidostoma	2
BKT14	POWD	2015-06-03	Arthropoda	Insecta	Trichoptera	Philopotamidae	Wormaldia	4
BKT14	POWD	2015-06-03	Arthropoda	Insecta	Trichoptera	Polycentropodidae	Polycentropus	1
BKT14	POWD	2015-06-03	Arthropoda	Insecta	Trichoptera	Rhyacophilidae	Rhyacophila	8
BKT14	POWD	2015-06-03	Annelida	Oligochaeta	Unidentified	Unidentified	Unidentified	13
MMP1	POWD	2015-05-13	Arthropoda	Insecta	Coleoptera	Elmidae	Oulimnius	33
MMP1	POWD	2015-05-13	Arthropoda	Insecta	Coleoptera	Elmidae	Optioservus	3
MMP1	POWD	2015-05-13	Arthropoda	Crustacea	Decapoda	Cambaridae	Cambarus	1
MMP1	POWD	2015-05-13	Arthropoda	Insecta	Diptera	Chironomidae	Unidentified	6
MMP1	POWD	2015-05-13	Arthropoda	Insecta	Diptera	Simuliidae	Simulium	1
MMP1	POWD	2015-05-13	Arthropoda	Insecta	Ephemeroptera	Baetidae	Diphetor	5
MMP1	POWD	2015-05-13	Arthropoda	Insecta	Ephemeroptera	Baetidae	Plauditus	53
MMP1	POWD	2015-05-13	Arthropoda	Insecta	Ephemeroptera	Baetidae	Baetis	3
MMP1	POWD	2015-05-13	Arthropoda	Insecta	Ephemeroptera	Baetidae	Acentrella	17
MMP1	POWD	2015-05-13	Arthropoda	Insecta	Ephemeroptera	Ephemerellidae	Serratella	1
MMP1	POWD	2015-05-13	Arthropoda	Insecta	Ephemeroptera	Ephemerellidae	Ephemerella	8
MMP1	POWD	2015-05-13	Arthropoda	Insecta	Ephemeroptera	Ephemerellidae	Drunella	3
MMP1	POWD	2015-05-13	Arthropoda	Insecta	Ephemeroptera	Heptageniidae	Maccaffertium	1
MMP1	POWD	2015-05-13	Arthropoda	Insecta	Ephemeroptera	Heptageniidae	Cinygmula	9
MMP1	POWD	2015-05-13	Arthropoda	Insecta	Ephemeroptera	Heptageniidae	Epeorus	11
MMP1	POWD	2015-05-13	Arthropoda	Insecta	Ephemeroptera	Leptophlebiidae	Paraleptophlebia	9
MMP1	POWD	2015-05-13	Arthropoda	Insecta	Megaloptera	Sialidae	Sialis	1
MMP1	POWD	2015-05-13	Arthropoda	Insecta	Odonata	Gomphidae	Lanthus	3
MMP1	POWD	2015-05-13	Arthropoda	Insecta	Plecoptera	Chloroperlidae	Suwallia	4
MMP1	POWD	2015-05-13	Arthropoda	Insecta	Plecoptera	Chloroperlidae	Haploperla	2
MMP1	POWD	2015-05-13	Arthropoda	Insecta	Plecoptera	Chloroperlidae	Alloperla	2
MMP1	POWD	2015-05-13	Arthropoda	Insecta	Plecoptera	Leuctridae	Leuctra	4
MMP1	POWD	2015-05-13	Arthropoda	Insecta	Plecoptera	Nemouridae	Amphinemura	1
MMP1	POWD	2015-05-13	Arthropoda	Insecta	Plecoptera	Peltoperlidae	Peltoperla	1
MMP1	POWD	2015-05-13	Arthropoda	Insecta	Plecoptera	Perlidae	Atteneuria	3
MMP1	POWD	2015-05-13	Arthropoda	Insecta	Plecoptera	Pteronarcyidae	Pteronarcys	1
MMP1	POWD	2015-05-13	Arthropoda	Insecta	Trichoptera	Glossosomatidae	Agapetus	1
MMP1	POWD	2015-05-13	Arthropoda	Insecta	Trichoptera	Hydropsychidae	Hydropsyche	3
MMP1	POWD	2015-05-13	Arthropoda	Insecta	Trichoptera	Hydropsychidae	Ceratopsyche	1
MMP1	POWD	2015-05-13	Arthropoda	Insecta	Trichoptera	Hydropsychidae	Diplectrona	10
MMP1	POWD	2015-05-13	Arthropoda	Insecta	Trichoptera	Lepidostomatidae	Lepidostoma	2
MMP1	POWD	2015-05-13	Arthropoda	Insecta	Trichoptera	Philopotamidae	Dolophilodes	7
MMP1	POWD	2015-05-13	Arthropoda	Insecta	Trichoptera	Polycentropodidae	Polycentropus	1
BKT5	POWD	2015-06-03	Arthropoda	Insecta	Coleoptera	Elmidae	Oulimnius	46
BKT5	POWD	2015-06-03	Arthropoda	Insecta	Coleoptera	Elmidae	Optioservus	2
BKT5	POWD	2015-06-03	Arthropoda	Insecta	Coleoptera	Psephenidae	Ectopria	1
BKT5	POWD	2015-06-03	Arthropoda	Insecta	Diptera	Chironomidae	Unidentified	14
BKT5	POWD	2015-06-03	Arthropoda	Insecta	Diptera	Simuliidae	Simulium	1
BKT5	POWD	2015-06-03	Arthropoda	Insecta	Diptera	Tipulidae	Antocha	1
BKT5	POWD	2015-06-03	Arthropoda	Insecta	Diptera	Tipulidae	Dicranota	1
BKT5	POWD	2015-06-03	Arthropoda	Insecta	Ephemeroptera	Baetidae	Diphetor	2
BKT5	POWD	2015-06-03	Arthropoda	Insecta	Ephemeroptera	Baetidae	Plauditus	58
BKT5	POWD	2015-06-03	Arthropoda	Insecta	Ephemeroptera	Ephemerellidae	Serratella	2
BKT5	POWD	2015-06-03	Arthropoda	Insecta	Ephemeroptera	Ephemerellidae	Ephemerella	9
BKT5	POWD	2015-06-03	Arthropoda	Insecta	Ephemeroptera	Heptageniidae	Epeorus	6
BKT5	POWD	2015-06-03	Arthropoda	Insecta	Ephemeroptera	Leptophlebiidae	Paraleptophlebia	8
BKT5	POWD	2015-06-03	Arthropoda	Insecta	Plecoptera	Chloroperlidae	Suwallia	2
BKT5	POWD	2015-06-03	Arthropoda	Insecta	Plecoptera	Leuctridae	Leuctra	2
BKT5	POWD	2015-06-03	Arthropoda	Insecta	Plecoptera	Nemouridae	Amphinemura	4
BKT5	POWD	2015-06-03	Arthropoda	Insecta	Plecoptera	Peltoperlidae	Peltoperla	7
BKT5	POWD	2015-06-03	Arthropoda	Insecta	Plecoptera	Perlidae	Acroneuria	4
BKT5	POWD	2015-06-03	Arthropoda	Insecta	Plecoptera	Perlodidae	Isoperla	2
BKT5	POWD	2015-06-03	Arthropoda	Insecta	Plecoptera	Pteronarcyidae	Pteronarcys	1
BKT5	POWD	2015-06-03	Arthropoda	Insecta	Trichoptera	Glossosomatidae	Agapetus	1
BKT5	POWD	2015-06-03	Arthropoda	Insecta	Trichoptera	Hydropsychidae	Hydropsyche	1
BKT5	POWD	2015-06-03	Arthropoda	Insecta	Trichoptera	Hydropsychidae	Diplectrona	17
BKT5	POWD	2015-06-03	Arthropoda	Insecta	Trichoptera	Lepidostomatidae	Lepidostoma	2
BKT5	POWD	2015-06-03	Arthropoda	Insecta	Trichoptera	Philopotamidae	Dolophilodes	14
BKT5	POWD	2015-06-03	Arthropoda	Insecta	Trichoptera	Rhyacophilidae	Rhyacophila	2
BKT7	POWD	2015-05-29	Arthropoda	Insecta	Coleoptera	Elmidae	Oulimnius	45
BKT7	POWD	2015-05-29	Arthropoda	Insecta	Coleoptera	Elmidae	Optioservus	1
BKT7	POWD	2015-05-29	Arthropoda	Insecta	Coleoptera	Psephenidae	Ectopria	3
BKT7	POWD	2015-05-29	Arthropoda	Insecta	Diptera	Ceratopogonidae	Probezzia	1
BKT7	POWD	2015-05-29	Arthropoda	Insecta	Diptera	Chironomidae	Unidentified	21
BKT7	POWD	2015-05-29	Arthropoda	Insecta	Diptera	Simuliidae	Simulium	2
BKT7	POWD	2015-05-29	Arthropoda	Insecta	Diptera	Tipulidae	Hexatoma	7
BKT7	POWD	2015-05-29	Arthropoda	Insecta	Ephemeroptera	Baetidae	Diphetor	1
BKT7	POWD	2015-05-29	Arthropoda	Insecta	Ephemeroptera	Baetidae	Plauditus	63
BKT7	POWD	2015-05-29	Arthropoda	Insecta	Ephemeroptera	Baetidae	Acentrella	1
BKT7	POWD	2015-05-29	Arthropoda	Insecta	Ephemeroptera	Ephemerellidae	Serratella	1
BKT7	POWD	2015-05-29	Arthropoda	Insecta	Ephemeroptera	Ephemerellidae	Ephemerella	3
BKT7	POWD	2015-05-29	Arthropoda	Insecta	Ephemeroptera	Ephemerellidae	Drunella	4
BKT7	POWD	2015-05-29	Arthropoda	Insecta	Ephemeroptera	Heptageniidae	Stenacron	1
BKT7	POWD	2015-05-29	Arthropoda	Insecta	Ephemeroptera	Heptageniidae	Maccaffertium	1
BKT7	POWD	2015-05-29	Arthropoda	Insecta	Ephemeroptera	Heptageniidae	Epeorus	8
BKT7	POWD	2015-05-29	Arthropoda	Insecta	Ephemeroptera	Leptophlebiidae	Paraleptophlebia	2
BKT7	POWD	2015-05-29	Arthropoda	Insecta	Plecoptera	Chloroperlidae	Sweltsa	1
BKT7	POWD	2015-05-29	Arthropoda	Insecta	Plecoptera	Chloroperlidae	Suwallia	3
BKT7	POWD	2015-05-29	Arthropoda	Insecta	Plecoptera	Leuctridae	Leuctra	4
BKT7	POWD	2015-05-29	Arthropoda	Insecta	Plecoptera	Nemouridae	Amphinemura	3
BKT7	POWD	2015-05-29	Arthropoda	Insecta	Plecoptera	Peltoperlidae	Peltoperla	1
BKT7	POWD	2015-05-29	Arthropoda	Insecta	Plecoptera	Perlodidae	Malirekus	2
BKT7	POWD	2015-05-29	Arthropoda	Insecta	Trichoptera	Glossosomatidae	Agapetus	2
BKT7	POWD	2015-05-29	Arthropoda	Insecta	Trichoptera	Hydropsychidae	Diplectrona	1
BKT7	POWD	2015-05-29	Arthropoda	Insecta	Trichoptera	Lepidostomatidae	Lepidostoma	1
BKT7	POWD	2015-05-29	Arthropoda	Insecta	Trichoptera	Philopotamidae	Dolophilodes	10
BKT7	POWD	2015-05-29	Arthropoda	Insecta	Trichoptera	Rhyacophilidae	Rhyacophila	1
MMP2	POWD	2015-05-29	Arthropoda	Insecta	Coleoptera	Elmidae	Oulimnius	53
MMP2	POWD	2015-05-29	Arthropoda	Insecta	Coleoptera	Elmidae	Optioservus	1
MMP2	POWD	2015-05-29	Arthropoda	Insecta	Diptera	Chironomidae	Unidentified	20
MMP2	POWD	2015-05-29	Arthropoda	Insecta	Diptera	Tipulidae	Tipula	1
MMP2	POWD	2015-05-29	Arthropoda	Insecta	Diptera	Tipulidae	Dicranota	2
MMP2	POWD	2015-05-29	Arthropoda	Insecta	Ephemeroptera	Baetidae	Plauditus	80
MMP2	POWD	2015-05-29	Arthropoda	Insecta	Ephemeroptera	Baetidae	Baetis	3
MMP2	POWD	2015-05-29	Arthropoda	Insecta	Ephemeroptera	Ephemerellidae	Eurylophella	2
MMP2	POWD	2015-05-29	Arthropoda	Insecta	Ephemeroptera	Ephemerellidae	Ephemerella	3
MMP2	POWD	2015-05-29	Arthropoda	Insecta	Ephemeroptera	Ephemerellidae	Drunella	1
MMP2	POWD	2015-05-29	Arthropoda	Insecta	Ephemeroptera	Heptageniidae	Cinygmula	3
MMP2	POWD	2015-05-29	Arthropoda	Insecta	Ephemeroptera	Heptageniidae	Epeorus	12
MMP2	POWD	2015-05-29	Arthropoda	Insecta	Ephemeroptera	Leptophlebiidae	Paraleptophlebia	5
MMP2	POWD	2015-05-29	Arthropoda	Insecta	Plecoptera	Chloroperlidae	Suwallia	5
MMP2	POWD	2015-05-29	Arthropoda	Insecta	Plecoptera	Chloroperlidae	Haploperla	1
MMP2	POWD	2015-05-29	Arthropoda	Insecta	Plecoptera	Leuctridae	Leuctra	4
MMP2	POWD	2015-05-29	Arthropoda	Insecta	Plecoptera	Nemouridae	Amphinemura	1
MMP2	POWD	2015-05-29	Arthropoda	Insecta	Plecoptera	Perlidae	Acroneuria	3
MMP2	POWD	2015-05-29	Arthropoda	Insecta	Plecoptera	Perlodidae	Isoperla	1
MMP2	POWD	2015-05-29	Arthropoda	Insecta	Plecoptera	Pteronarcyidae	Pteronarcys	1
MMP2	POWD	2015-05-29	Arthropoda	Insecta	Trichoptera	Glossosomatidae	Agapetus	2
MMP2	POWD	2015-05-29	Arthropoda	Insecta	Trichoptera	Philopotamidae	Dolophilodes	9
MMP2	POWD	2015-05-29	Arthropoda	Insecta	Trichoptera	Polycentropodidae	Polycentropus	1
MMP2	POWD	2015-05-29	Arthropoda	Insecta	Trichoptera	Rhyacophilidae	Rhyacophila	1
BKT9	POWD	2015-06-03	Arthropoda	Insecta	Coleoptera	Elmidae	Oulimnius	18
BKT9	POWD	2015-06-03	Arthropoda	Insecta	Coleoptera	Elmidae	Optioservus	2
BKT9	POWD	2015-06-03	Arthropoda	Insecta	Coleoptera	Elmidae	Promoresia	2
BKT9	POWD	2015-06-03	Arthropoda	Insecta	Coleoptera	Psephenidae	Ectopria	2
BKT9	POWD	2015-06-03	Arthropoda	Crustacea	Decapoda	Cambaridae	Cambarus	1
BKT9	POWD	2015-06-03	Arthropoda	Insecta	Diptera	Ceratopogonidae	Ceratopogon	1
BKT9	POWD	2015-06-03	Arthropoda	Insecta	Diptera	Chironomidae	Unidentified	11
BKT9	POWD	2015-06-03	Arthropoda	Insecta	Diptera	Simuliidae	Simulium	6
BKT9	POWD	2015-06-03	Arthropoda	Insecta	Diptera	Tipulidae	Dicranota	6
BKT9	POWD	2015-06-03	Arthropoda	Insecta	Ephemeroptera	Baetidae	Diphetor	1
BKT9	POWD	2015-06-03	Arthropoda	Insecta	Ephemeroptera	Baetidae	Plauditus	39
BKT9	POWD	2015-06-03	Arthropoda	Insecta	Ephemeroptera	Ephemerellidae	Ephemerella	9
BKT9	POWD	2015-06-03	Arthropoda	Insecta	Ephemeroptera	Ephemerellidae	Drunella	3
BKT9	POWD	2015-06-03	Arthropoda	Insecta	Ephemeroptera	Heptageniidae	Stenacron	1
BKT9	POWD	2015-06-03	Arthropoda	Insecta	Ephemeroptera	Heptageniidae	Epeorus	30
BKT9	POWD	2015-06-03	Arthropoda	Insecta	Ephemeroptera	Leptophlebiidae	Paraleptophlebia	3
BKT9	POWD	2015-06-03	Arthropoda	Insecta	Ephemeroptera	Leptophlebiidae	Unidentified	2
BKT9	POWD	2015-06-03	Arthropoda	Insecta	Plecoptera	Chloroperlidae	Sweltsa	1
BKT9	POWD	2015-06-03	Arthropoda	Insecta	Plecoptera	Chloroperlidae	Suwallia	12
BKT9	POWD	2015-06-03	Arthropoda	Insecta	Plecoptera	Chloroperlidae	Haploperla	3
BKT9	POWD	2015-06-03	Arthropoda	Insecta	Plecoptera	Leuctridae	Leuctra	3
BKT9	POWD	2015-06-03	Arthropoda	Insecta	Plecoptera	Nemouridae	Amphinemura	3
BKT9	POWD	2015-06-03	Arthropoda	Insecta	Plecoptera	Peltoperlidae	Peltoperla	6
BKT9	POWD	2015-06-03	Arthropoda	Insecta	Plecoptera	Perlidae	Acroneuria	5
BKT9	POWD	2015-06-03	Arthropoda	Insecta	Plecoptera	Perlodidae	Isoperla	4
BKT9	POWD	2015-06-03	Arthropoda	Insecta	Plecoptera	Perlodidae	Yugus	1
BKT9	POWD	2015-06-03	Arthropoda	Insecta	Plecoptera	Pteronarcyidae	Pteronarcys	6
BKT9	POWD	2015-06-03	Arthropoda	Insecta	Trichoptera	Glossosomatidae	Agapetus	1
BKT9	POWD	2015-06-03	Arthropoda	Insecta	Trichoptera	Hydropsychidae	Hydropsyche	1
BKT9	POWD	2015-06-03	Arthropoda	Insecta	Trichoptera	Hydropsychidae	Diplectrona	3
BKT9	POWD	2015-06-03	Arthropoda	Insecta	Trichoptera	Philopotamidae	Dolophilodes	15
BKT9	POWD	2015-06-03	Arthropoda	Insecta	Trichoptera	Rhyacophilidae	Rhyacophila	3
DAM1	POWD	2015-05-19	Arthropoda	Insecta	Coleoptera	Elmidae	Oulimnius	17
DAM1	POWD	2015-05-19	Arthropoda	Insecta	Coleoptera	Elmidae	Optioservus	2
DAM1	POWD	2015-05-19	Arthropoda	Insecta	Coleoptera	Psephenidae	Ectopria	1
DAM1	POWD	2015-05-19	Arthropoda	Crustacea	Decapoda	Cambaridae	Cambarus	3
DAM1	POWD	2015-05-19	Arthropoda	Insecta	Diptera	Chironomidae	Unidentified	9
DAM1	POWD	2015-05-19	Arthropoda	Insecta	Diptera	Empididae	Chelifera	1
DAM1	POWD	2015-05-19	Arthropoda	Insecta	Diptera	Tanyderidae	Protoplasa	1
DAM1	POWD	2015-05-19	Arthropoda	Insecta	Diptera	Tipulidae	Tipula	1
DAM1	POWD	2015-05-19	Arthropoda	Insecta	Diptera	Tipulidae	Antocha	2
DAM1	POWD	2015-05-19	Arthropoda	Insecta	Diptera	Tipulidae	Dicranota	2
DAM1	POWD	2015-05-19	Arthropoda	Insecta	Diptera	Tipulidae	Hexatoma	3
DAM1	POWD	2015-05-19	Arthropoda	Insecta	Ephemeroptera	Baetidae	Diphetor	2
DAM1	POWD	2015-05-19	Arthropoda	Insecta	Ephemeroptera	Baetidae	Plauditus	52
DAM1	POWD	2015-05-19	Arthropoda	Insecta	Ephemeroptera	Baetidae	Baetis	6
DAM1	POWD	2015-05-19	Arthropoda	Insecta	Ephemeroptera	Baetidae	Acentrella	3
DAM1	POWD	2015-05-19	Arthropoda	Insecta	Ephemeroptera	Ephemerellidae	Serratella	1
DAM1	POWD	2015-05-19	Arthropoda	Insecta	Ephemeroptera	Ephemerellidae	Ephemerella	11
DAM1	POWD	2015-05-19	Arthropoda	Insecta	Ephemeroptera	Heptageniidae	Leucrocuta	4
DAM1	POWD	2015-05-19	Arthropoda	Insecta	Ephemeroptera	Heptageniidae	Cinygmula	4
DAM1	POWD	2015-05-19	Arthropoda	Insecta	Ephemeroptera	Heptageniidae	Epeorus	6
DAM1	POWD	2015-05-19	Arthropoda	Insecta	Ephemeroptera	Leptophlebiidae	Paraleptophlebia	21
DAM1	POWD	2015-05-19	Arthropoda	Insecta	Megaloptera	Corydalidae	Nigronia	1
DAM1	POWD	2015-05-19	Arthropoda	Insecta	Odonata	Gomphidae	Lanthus	1
DAM1	POWD	2015-05-19	Arthropoda	Insecta	Plecoptera	Leuctridae	Leuctra	6
DAM1	POWD	2015-05-19	Arthropoda	Insecta	Plecoptera	Nemouridae	Amphinemura	3
DAM1	POWD	2015-05-19	Arthropoda	Insecta	Plecoptera	Peltoperlidae	Peltoperla	4
DAM1	POWD	2015-05-19	Arthropoda	Insecta	Plecoptera	Pteronarcyidae	Pteronarcys	1
DAM1	POWD	2015-05-19	Arthropoda	Insecta	Trichoptera	Glossosomatidae	Agapetus	3
DAM1	POWD	2015-05-19	Arthropoda	Insecta	Trichoptera	Hydropsychidae	Diplectrona	6
DAM1	POWD	2015-05-19	Arthropoda	Insecta	Trichoptera	Lepidostomatidae	Lepidostoma	2
DAM1	POWD	2015-05-19	Arthropoda	Insecta	Trichoptera	Limnephilidae	Pycnopsyche	1
DAM1	POWD	2015-05-19	Arthropoda	Insecta	Trichoptera	Philopotamidae	Dolophilodes	3
DAM1	POWD	2015-05-19	Arthropoda	Insecta	Trichoptera	Polycentropodidae	Polycentropus	1
DAM1	POWD	2015-05-19	Arthropoda	Insecta	Trichoptera	Psychomyiidae	Lype	1
DAM1	POWD	2015-05-19	Arthropoda	Insecta	Trichoptera	Rhyacophilidae	Rhyacophila	1

## Sheet: Sticky Traps
NEST	STREAM	FLAG	BANK	SIDE	COLLECTION_DATE	TOTAL_INDIVIDUALS	TOTAL_EPT_INDIVIDUALS	PERCENT_EPT	Baetidae	Ephemeridae	Ephemerllidae	Heptageniidae	Leptophlebiidae	Ameletidae	Unknown_Ephemeroptera	Chloroperlidae	Leuctridae (NOT INCLUDED)	Nemouridae NOT INCLUDED)	Peltoperlidae	Perlidae	Perlodidae	Beraeidae	Brachycentridae	Goeridae	Heliopsychidae	Hydropsychidae	Lepidostomatidae	Limnephilidae	Molannidae	Odontoceridae	Philopotamidae	Phryganediae	Psychomyiidae	Rhyacophilidae	Unknown_Trichoptera
BKT3	LAUREL	10	LAB	Back	2015-05-14	730	2	0.00273973	0	0	0	0	0	0	0	2	27	0	0	0	0	0	0	0	0	0	0	0	0	0	0	0	0	0	0
BKT3	LAUREL	10	LAB	Back	2015-05-29	541	3	0.00554529	0	0	0	0	0	0	0	3	11	0	0	0	0	0	0	0	0	0	0	0	0	0	0	0	0	0	0
BKT3	LAUREL	10	LAB	Back	2015-06-09	731	18	0.0246238	1	0	0	0	0	0	0	15	2	4	1	0	0	0	0	0	0	0	0	0	0	0	0	0	0	1	0
BKT3	LAUREL	10	LAB	Back	2015-06-24	922	12	0.0130152	0	0	0	0	0	0	0	12	20	1	0	0	0	0	0	0	0	0	0	0	0	0	0	0	0	0	0
BKT3	LAUREL	10	LAB	Back	2015-07-07	831	2	0.00240674	0	0	0	0	0	0	0	2	47	2	0	0	0	0	0	0	0	0	0	0	0	0	0	0	0	0	0
BKT2	LOYAL	13	LAB	Back	2015-05-20	904	62	0.0685841	4	0	0	0	0	0	0	34	0	3	0	0	21	0	0	0	0	3	0	0	0	0	0	0	0	0	0
BKT2	LOYAL	13	LAB	Back	2015-06-03	720	64	0.0888889	1	0	1	1	0	0	0	56	0	5	0	0	0	0	0	0	0	0	0	0	0	0	0	0	0	2	3
BKT2	LOYAL	13	LAB	Back	2015-06-17	1085	52	0.0479263	0	0	0	0	0	0	0	47	2	0	0	0	0	1	0	0	0	1	0	0	0	0	0	0	0	1	2
BKT2	LOYAL	13	LAB	Back	2015-06-30	782	6	0.00767263	0	0	0	0	0	0	0	6	0	0	0	0	0	0	0	0	0	0	0	0	0	0	0	0	0	0	0
BKT2	LOYAL	13	LAB	Back	2015-07-15	749	1	0.00133511	0	0	0	1	0	0	0	0	0	0	0	0	0	0	0	0	0	0	0	0	0	0	0	0	0	0	0
BKT1	LOYAL	50	LAB	Back	2015-05-20	1001	171	0.170829	0	0	0	2	0	0	0	116	2	4	0	0	36	0	0	0	0	12	0	0	0	0	0	4	0	1	0
BKT1	LOYAL	50	LAB	Back	2015-06-03	644	139	0.215839	2	0	3	0	0	0	0	119	2	1	0	0	5	4	0	1	0	0	0	0	0	0	0	4	0	1	0
BKT1	LOYAL	50	LAB	Back	2015-06-17	668	77	0.115269	0	0	0	1	0	0	0	73	0	1	0	0	1	0	0	0	0	0	0	0	0	0	0	0	0	1	1
BKT1	LOYAL	50	LAB	Back	2015-06-30	520	10	0.0192308	0	0	0	0	1	0	0	6	1	0	0	0	1	1	0	0	0	1	0	0	0	0	0	0	0	0	0
BKT1	LOYAL	50	LAB	Back	2015-07-15	556	2	0.00359712	0	0	0	0	0	0	0	2	5	0	0	0	0	0	0	0	0	0	0	0	0	0	0	0	0	0	0
MMP1	POWD	1	LAB	Back	2015-05-13	504	5	0.00992063	0	0	0	0	1	0	0	2	2	1	0	0	2	0	0	0	0	0	0	0	0	0	0	0	0	0	0
MMP1	POWD	1	LAB	Back	2015-05-29	976	11	0.0112705	0	0	0	0	0	0	0	8	3	0	0	0	2	0	1	0	0	0	0	0	0	0	0	0	0	0	0
MMP1	POWD	1	LAB	Back	2015-06-09	952	50	0.052521	0	0	0	1	0	0	0	22	0	0	1	0	1	23	0	0	0	0	0	0	0	0	0	0	0	1	1
MMP1	POWD	1	LAB	Back	2015-06-24	927	31	0.0334412	0	0	2	0	0	0	0	11	3	1	2	0	2	10	0	0	0	1	0	0	0	0	0	0	0	3	0
MMP1	POWD	1	LAB	Back	2015-07-07	777	12	0.015444	0	0	0	0	0	0	0	8	2	0	1	1	0	1	0	0	0	0	0	0	0	0	0	0	0	0	1
DAM1	POWD	6	LAB	Back	2015-05-19	741	12	0.0161943	0	0	0	1	0	0	0	9	10	0	0	0	1	1	0	0	0	0	0	0	0	0	0	0	0	0	0
DAM1	POWD	6	LAB	Back	2015-06-03	889	28	0.0314961	0	1	0	3	1	0	0	13	4	0	2	0	2	2	2	1	0	0	0	0	0	0	0	0	0	0	1
DAM1	POWD	6	LAB	Back	2015-06-17	980	36	0.0367347	0	0	0	2	2	0	0	23	3	0	1	0	4	3	0	0	0	0	0	0	0	0	0	0	0	0	1
DAM1	POWD	6	LAB	Back	2015-06-30	829	14	0.0168878	0	0	0	1	0	0	0	7	0	1	2	1	2	0	0	0	0	0	0	0	0	0	0	0	0	0	1
DAM1	POWD	6	LAB	Back	2015-07-15	967	9	0.00930714	0	0	0	0	1	0	0	4	0	0	0	0	4	0	0	0	0	0	0	0	0	0	0	0	0	0	0
BKT5	POWD	16	LAB	Back	2015-05-19	593	14	0.0236088	0	0	0	2	1	0	0	9	6	0	1	0	0	0	0	0	0	0	0	0	0	0	0	0	0	0	1
BKT5	POWD	16	LAB	Back	2015-06-03	695	20	0.028777	0	0	0	1	0	0	0	7	3	1	1	0	0	5	1	2	0	0	0	0	0	0	0	1	0	2	0
BKT5	POWD	16	LAB	Back	2015-06-17	888	41	0.0461712	1	0	0	1	0	0	0	12	4	1	11	0	0	3	0	2	0	0	3	0	0	0	0	2	0	0	6
BKT5	POWD	16	LAB	Back	2015-06-30	766	4	0.00522193	0	0	0	0	0	0	0	2	1	1	0	0	0	0	0	0	0	0	0	0	0	0	0	1	0	1	0
BKT5	POWD	16	LAB	Back	2015-07-15	753	6	0.00796813	0	0	0	1	0	0	0	0	3	2	0	0	4	0	0	0	0	0	0	0	0	0	0	0	0	1	0
BKT7	POWD	30	LAB	Back	2015-05-13	480	8	0.0166667	1	0	0	0	0	0	0	6	21	0	0	0	1	0	0	0	0	0	0	0	0	0	0	0	0	0	0
BKT7	POWD	30	LAB	Back	2015-05-29	667	32	0.047976	0	0	0	0	0	0	1	27	1	1	0	0	2	0	0	0	0	1	0	0	0	0	0	0	0	0	1
BKT7	POWD	30	LAB	Back	2015-06-09	815	42	0.0515337	0	0	1	0	1	0	0	28	7	3	3	0	0	5	0	0	0	0	0	0	0	0	0	0	0	3	1
BKT7	POWD	30	LAB	Back	2015-06-24	1007	28	0.0278054	0	0	0	2	0	0	0	18	6	3	1	0	1	2	0	0	0	1	0	0	0	0	0	0	0	3	0
BKT7	POWD	30	LAB	Back	2015-07-07	923	5	0.00541712	0	0	0	1	0	0	0	3	1	0	0	0	1	0	0	0	0	0	0	0	0	0	0	0	0	0	0
MMP2	POWD	40	LAB	Back	2015-05-13	484	5	0.0103306	0	0	0	0	0	0	0	3	20	1	0	0	1	0	0	0	0	0	0	0	0	0	0	0	0	0	1
MMP2	POWD	40	LAB	Back	2015-05-29	678	57	0.0840708	0	0	0	0	0	0	0	47	2	1	3	0	1	0	0	3	0	1	0	0	0	0	0	0	0	0	2
MMP2	POWD	40	LAB	Back	2015-06-09	1415	64	0.0452297	0	0	0	2	0	0	0	57	2	3	0	0	0	2	0	0	0	1	0	0	0	0	0	0	0	2	0
MMP2	POWD	40	LAB	Back	2015-06-24	731	38	0.0519836	0	0	1	0	1	0	0	25	5	6	0	0	3	0	2	0	0	0	1	0	0	0	0	1	0	2	2
MMP2	POWD	40	LAB	Back	2015-07-07	994	11	0.0110664	0	0	0	1	0	0	0	8	3	0	0	0	1	0	0	0	0	0	0	0	0	0	0	0	0	0	1
BKT9	POWD	45	LAB	Back	2015-05-19	752	43	0.0571809	0	0	0	1	1	0	1	29	10	0	2	0	3	3	0	0	0	0	0	0	0	0	0	0	0	0	2
BKT9	POWD	45	LAB	Back	2015-06-03	844	64	0.0758294	0	0	1	2	0	0	0	54	3	3	1	0	2	0	0	1	0	0	1	0	0	0	0	0	0	0	2
BKT9	POWD	45	LAB	Back	2015-06-17	1479	99	0.0669371	0	0	0	0	0	0	0	91	7	8	1	0	2	1	0	0	0	0	0	0	0	0	0	0	0	2	2
BKT9	POWD	45	LAB	Back	2015-06-30	1033	34	0.0329138	0	0	0	0	0	0	0	17	2	3	0	0	0	0	2	0	0	2	0	0	0	0	0	2	0	11	0
BKT9	POWD	45	LAB	Back	2015-07-15	831	7	0.00842359	0	0	0	0	1	0	0	1	24	0	0	0	1	0	0	0	0	0	0	0	0	0	0	0	0	4	0
BKT14	POWD	28_TRIB	LAB	Back	2015-05-29	606	1	0.00165017	0	0	0	0	0	0	0	0	25	4	0	0	0	0	0	0	0	0	0	0	0	0	1	0	0	0	0
BKT14	POWD	28_TRIB	LAB	Back	2015-06-03	597	4	0.00670017	0	0	0	0	0	0	0	2	32	0	0	0	0	0	0	0	0	0	0	0	0	0	2	0	0	0	0
