# Supplementary material for: Stream acidification and reduced aquatic prey availability are associated with dietary shifts in an obligate riparian Neotropical migratory songbird
Source: PeerJ journal article supplement (doi:10.7717/peerj.5141), 2018-07-06

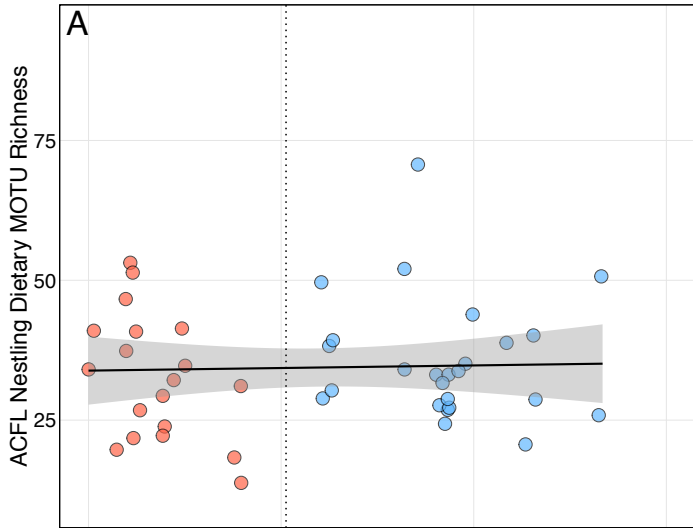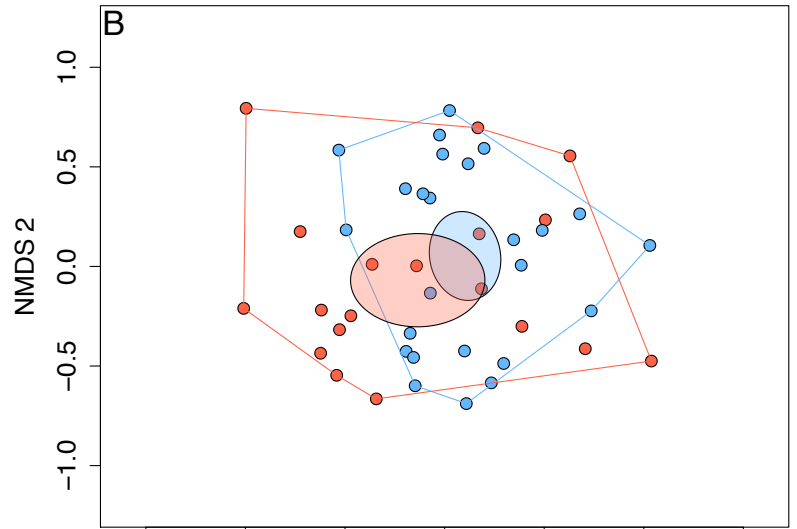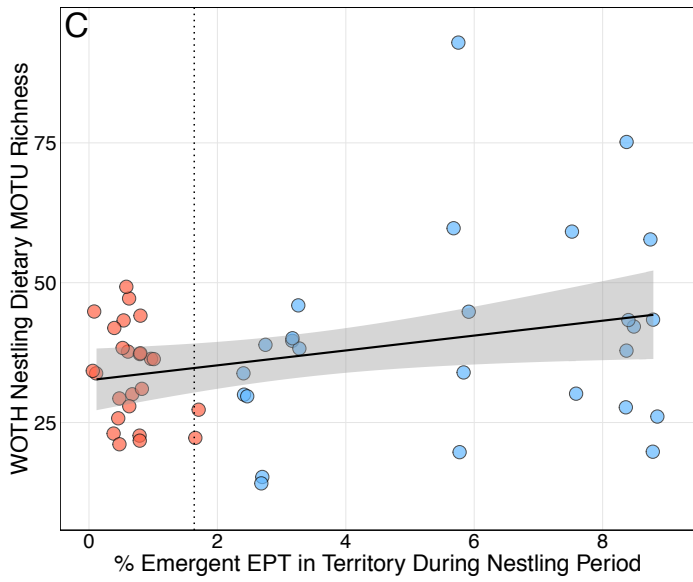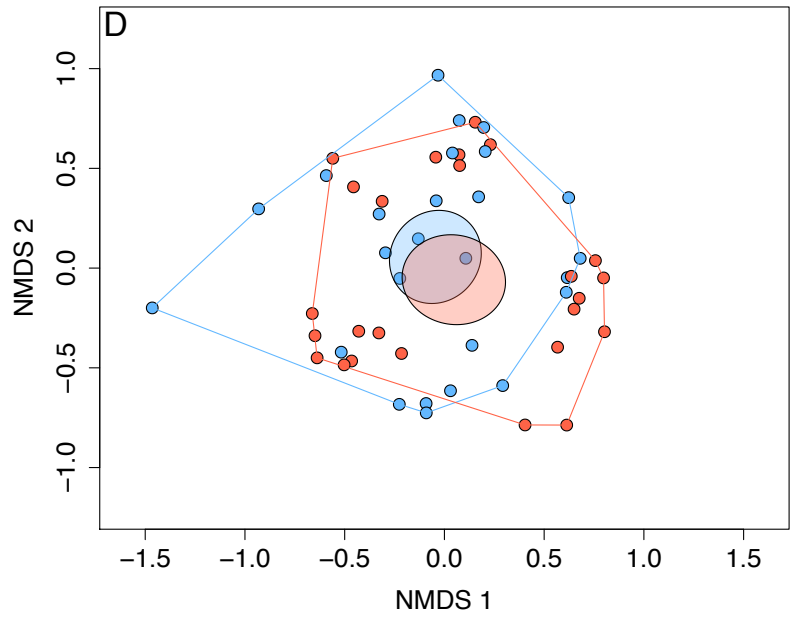

Supplement: SupplementalFigure3.pdf [file SupplementalFigure3.pdf]
